# Supplementary material for: The impact of apical and basolateral albumin on intestinal zinc resorption in the Caco-2/HT-29-MTX co-culture model
Source: Royal Society of Chemistry journal article supplement (doi:10.1039/c8mt00064f), 2018-01-01
Supplement: c8mt00064f1.pdf [file c8mt00064f1.pdf]

## Supplemental Material

### The impact of apical and basolateral albumin on intestinal zinc resorption in the Caco-2/HT-29-MTX co-culture model

Maria Maares<sup>1</sup>, Ayşe Duman<sup>1</sup>, Claudia Keil<sup>1</sup>, Tanja Schwerdtle<sup>2,3</sup>, Hajo Haase<sup>1,3,\*</sup>

<sup>1</sup> Department of Food Chemistry and Toxicology, Berlin Institute of Technology, Germany;

<sup>2</sup> Institute of Nutritional Science, University of Potsdam, Germany;

<sup>3</sup> TraceAge - DFG Research Unit on Interactions of essential trace elements in healthy and diseased elderly, Potsdam-Berlin-Jena, Germany

\*Corresponding author

## Supplemental Methods

### Real time PCR

QPCR-analysis for ALP and MUC5AC was performed as described in the main text, using the primer listed in Suppl. Table S1.

**Table S1. Oligonucleotide sequences used for real-time PCR**

| Primer  | NCBI Reference Sequence | Sequence fwd 5'-3'   | Sequence rev 5'-3'   | Ref  |
|---------|-------------------------|----------------------|----------------------|------|
| ALP     | NM_001631.4             | CCGCTTTAACCAGTGCAACA | CCCATGAGATGGGTCACAGA | [S1] |
| MUC5AC  | NM_001304359.1          | CATCAACGGGACCCTGTACC | ACAGGTCGACTGGTTCTGGT |      |
| β-actin | NG_007992.1             | CGCCCCAGGCACCAGGGC   | GCTGGGGTGTGAAGGT     | [S2] |

### Histological staining of mucins

The mucin-secretion of Caco-2/HT-29-MTX co-cultures was investigated by histological staining of anionic mucins, using alcianblue, and neutral mucins with the PAS (periodic acid-Schiff)-staining. Therefore, a total of 120.000 cells was cultivated in 6-well plates for 21d, whereas several ratios of Caco-2 and HT-29-MTX were co-cultivated (Caco-2/HT-29-MTX: 100/0, 90/10, 75/25, 50/50, 0/100). The

protocols for the alcianblue- and PAS-staining were adapted after [S3]. Prior to the staining, cells were washed carefully with PBS and fixed using 3.7% formaldehyde in PBS. For the alcianblue-staining, cells were washed again with PBS, incubated with 3% acetic acid for 3min cells and directly treated with 1% alcianblue 8GX (in 3% acetic acid) for 30min. Subsequently, the staining reagent was carefully removed, cells were washed with H<sub>2</sub>O and macroscopic pictures were taken. Prior to the PAS-staining, cells were incubated with 5% periodic acid for 5min, washed carefully with PBS and incubated with Schiff-reagents for 15min. The Schiff reagent was generated following the method from Graumann [S4] using 5% pararosanilin. After successful incubation, Schiff-reagent was removed from the cells and pictures were taken instantly.

#### *Alkaline phosphatase activity*

The effect of cellular ratio on the activity of alkaline phosphatase (ALP) in co-cultures of Caco-2 and HT-29-MTX was investigated, examining several Caco-2/HT-29-MTX ratios: 100/0, 90/10, 75/25, 50/50 and 0/100. Therefore, two days prior to the HT29-MTX cells, Caco-2 cells were transferred to 96-well plates (a total of 5,000 cells) and ALP-activity after 21d of cultivation was analyzed as described [S1].

## Supplemental Figures

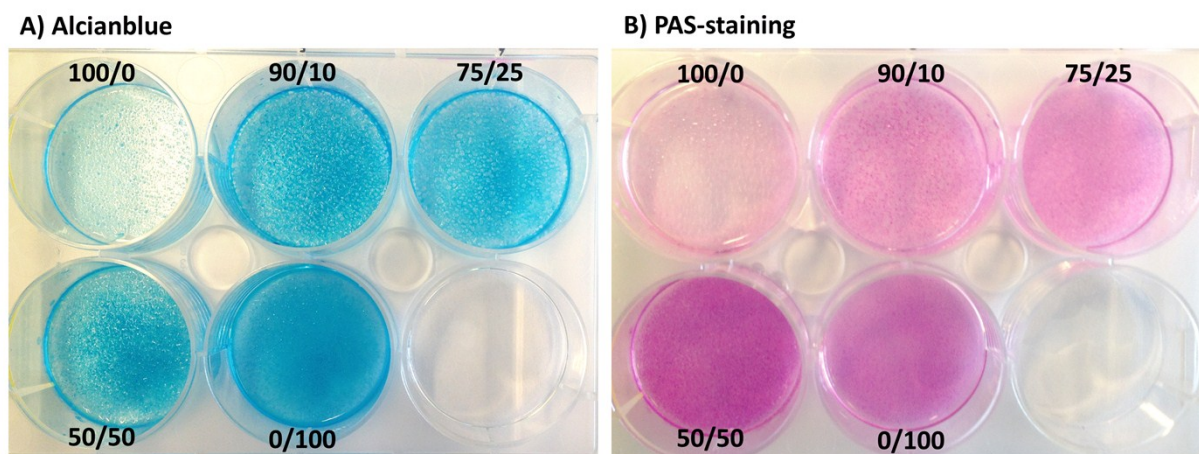

**Figure SF1: Histological analysis of secreted mucins by Caco-2/HT-29-MTX co-cultures.** Co-cultures of various ratios of Caco-2 and HT-29-MTX cells were cultured for 21d and mucin secretion was investigated using alcianblue- (A) and PAS-staining (B).

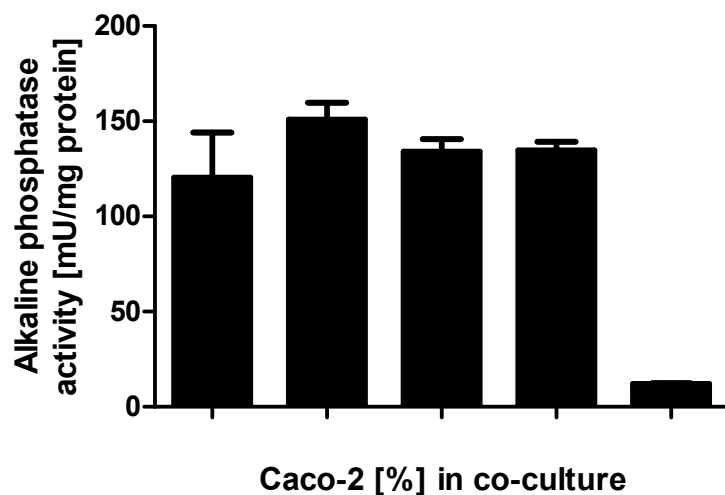

**Figure SF2: Activity of Alkaline phosphatase (ALP) in Caco-2 and HT-29-MTX co-cultures.** Shown is the ALP-activity in Caco-2/HT-29-MTX co-cultures with different cellular ratios depicted as the relative amount of Caco-2 cells. Enzyme activity was measured after 21d of cultivation using the ALP-assay and is displayed relative to cellular protein. Data are displayed as means + SD of three independent experiments.

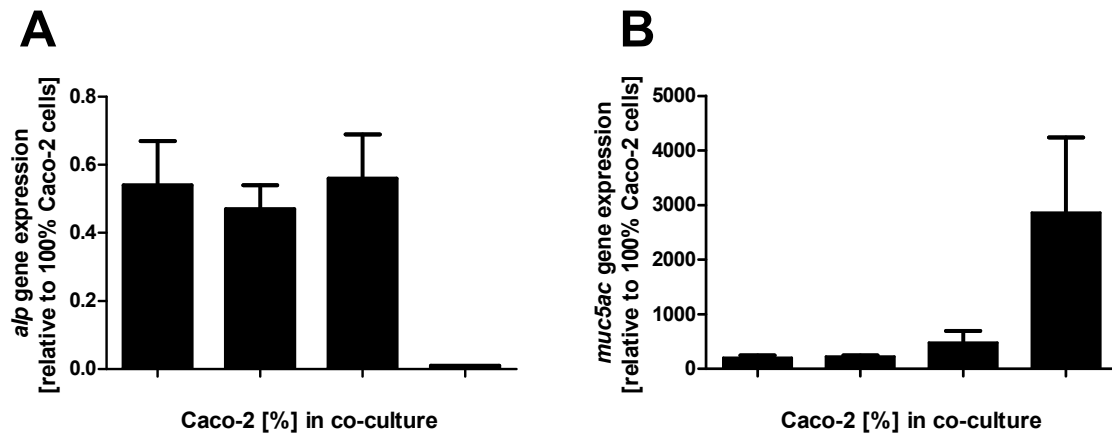

**Figure SF3: Expression of characteristic genes for Caco-2 and HT-29-MTX in the co-cultures.** Gene expression of differentiation marker *alp* [S1] and *muc5ac*, which is one of the characteristic mucins secreted by HT-29-MTX [S5], was analyzed in Caco-2/HT-29-MTX co-cultures after 21d of cultivation using qPCR (A) *Alp*-expression is shown relative to Caco-2 monocultures. (B) *Muc5ac*-expression is depicted relative to Caco-2 monocultures. Data are shown as means + SD of three replicates.

## Without BSA

**A**

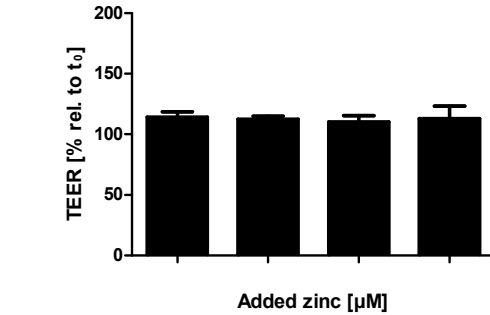

## With BSA

**B**

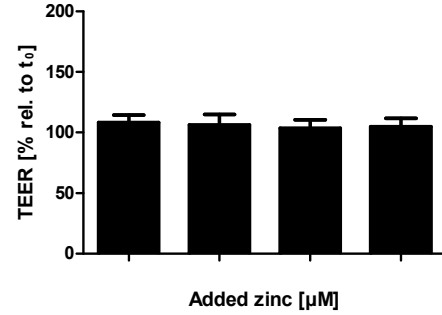

**C**

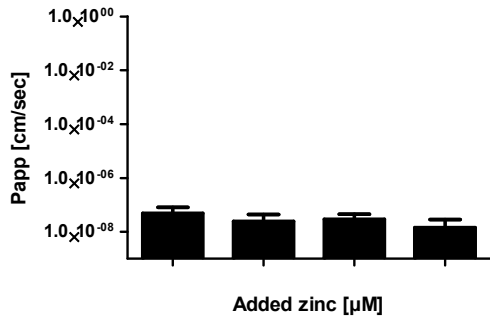

**D**

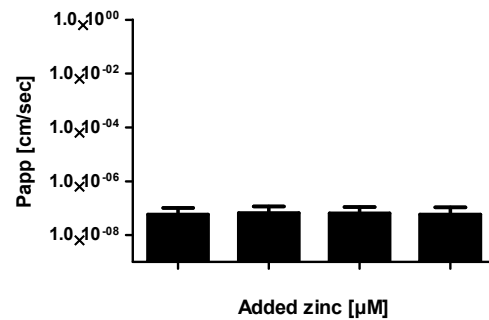

**Figure SF4: Integrity of Caco-2/HT-29-MTX cell monolayers used for the transport studies depicted in Fig. 6 measured as TEER (A, C) and paracellular permeability (C, D).** Shown is the TEER of cell-monolayers after the transport-experiment relative to TEER measured before incubation with zinc and 0mg/mL (A) or 30mg/mL albumin, respectively. The permeability of the cell monolayer during the transport assay without (C) or with albumin (D) is depicted as the apparent permeability ( $P_{app}$ ) of a 20kDa FITC-Dextran. Data are shown as means + SD of three replicates.

|                                             | WST            |                | MTT            |               | NRU            |                | SRB            |                |
|---------------------------------------------|----------------|----------------|----------------|---------------|----------------|----------------|----------------|----------------|
|                                             | 0% FCS         | 10% FCS        | 0% FCS         | 10% FCS       | 0% FCS         | 10% FCS        | 0% FCS         | 10% FCS        |
| Best-fit values                             |                |                |                |               |                |                |                |                |
| Bottom                                      | 21,97          | 33,95          | 9,525          | -42,44        | 0.0            | 0.0            | 3,663          | 1,599          |
| Top                                         | 97,04          | 87,61          | 109,7          | 104,1         | 111,6          | 105,1          | 108,6          | 103,3          |
| Hill slope                                  | -2,315         | -4,216         | 2,473          | 2,881         | -4,163         | -4,165         | -5,034         | -5,012         |
| 95% Confidence Interval of LC <sub>50</sub> | 162.5 to 567.7 | 315.4 to 761.2 | 247.4 to 356.3 | 214.1 to 2694 | 397.7 to 486.8 | 648.2 to 741.6 | 239.1 to 306.4 | 451.2 to 506.9 |
| Goodness of Fit                             |                |                |                |               |                |                |                |                |
| Degree of Freedom                           | 17             | 17             | 17             | 17            | 18             | 18             | 17             | 17             |
| R <sup>2</sup>                              | 0.7939         | 0.6740         | 0.9664         | 0.9453        | 0.9601         | 0.9761         | 0.9719         | 0.9860         |
| Absolute Sum of Squares                     | 4,033          | 3,543          | 1,094          | 1,294         | 1,294          | 456.2          | 1,219          | 402.1          |
| Standard deviation of residuals             | 15.40          | 14.44          | 8.023          | 8.723         | 8.479          | 5.034          | 8.467          | 4.863          |

**Table ST2: Parameters of the non-linear regression analysis applied in the zinc cytotoxicity study in Fig. 3.** Shown are parameters of the applied non-linear regression using a sigmoidal dose-response curve with variable slope as a function of the logarithm of zinc concentration. Data were obtained in three independent experiments and analyzed with GraphPad Prism software version 5.01 (GraphPad Software Inc., CA, USA).

## Supplemental References

- [S1] M. Maares, C. Keil, S. Thomsen, D. Günzel, B. Wiesner, H. Haase, Characterization of Caco-2 cells stably expressing the protein-based zinc probe eCalwy-5 as a model system for investigating intestinal zinc transport, *Journal of Trace Elements in Medicine and Biology* (2018).
- [S2] K. Wolf, C. Schulz, G.A.J. Riegger, M. Pfeifer, Tumour necrosis factor- $\alpha$  induced CD70 and interleukin-7R mRNA expression in BEAS-2B cells, *European Respiratory Journal* 20(2) (2002) 369-375.
- [S3] H. Denk, H. Künzele, H. Plenk, J. Rüschoff, W. Seller, *Romeis Mikroskopische Technik*. 17., neubearbeitete Auflage, Urban und Schwarzenberg, München-Wien. Baltimore (1989) 439-50.
- [S4] W. Graumann, *Zur Standardisierung des Schiffschens Reagens*, S HIRZEL VERLAG Stuttgart, 1953, pp. 225-226.
- [S5] G. Nollevaux, C. Deville, B. El Moualij, W. Zorzi, P. Deloyer, Y.J. Schneider, O. Peulen, G. Dandrifosse, Development of a serum-free co-culture of human intestinal epithelium cell-lines (Caco-2/HT29-5M21), *BMC cell biology* 7 (2006) 20.
